# Supplementary material for: First Report of the Parasitic Nematode Pseudoterranova spp. Found in Mediterranean Monk Seal (Monachus monachus) in Greece: Conservation Implications
Source: MDPI journal article supplement (doi:10.3390/conservation2010010), 2022-02-23
Supplement: s1 [file s1]

Supplementary Material

# First Report of the Parasitic Nematode *Pseudoterranova* spp. Found in Mediterranean Monk Seal (*Monachus monachus*) in Greece: Conservation Implications

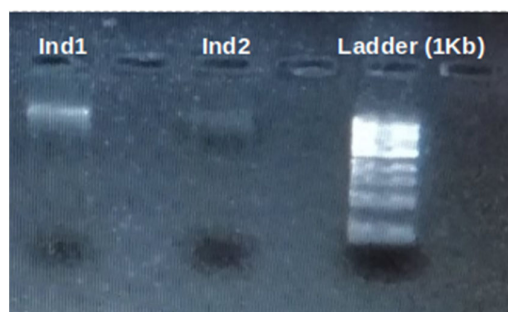

**Figure S1.** DNA extraction of the two individuals (Ind1 and Ind2) using the standard phenol/chloroform protocol. The Ladder is at 1Kb per lane.

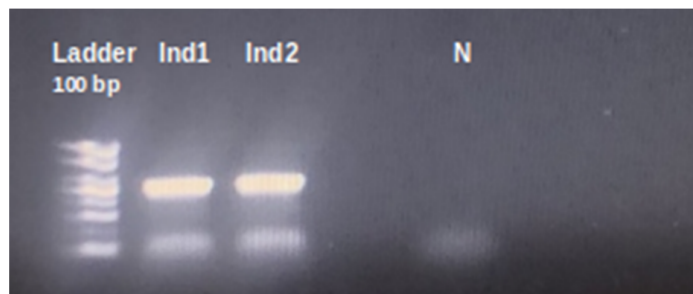

**Figure S2.** PCR of the 585bp amplified product of the Cytochrome oxidase subunit I gene for the two individuals (Ind1 and Ind2) including a negative control (N). The Ladder is at 100 bp per lane.
